# Supplementary material for: Quantification of Fecal Short Chain Fatty Acids by Liquid Chromatography Tandem Mass Spectrometry—Investigation of Pre-Analytic Stability
Source: PubMed Central journal article supplement (PMC6523859; doi:10.3390/biom9040121), 2019-03-28
Supplement: biomolecules-09-00121-s001.pdf [file biomolecules-09-00121-s001.pdf]

## Supplementary Data

# Quantification of Fecal Short Chain Fatty Acids by Liquid Chromatography Tandem Mass Spectrometry— Investigation of Pre-Analytic Stability

Gerhard Liebisch <sup>1,\*</sup>, Josef Ecker <sup>2,3</sup>, Sebastian Roth <sup>1</sup>, Sabine Schweizer <sup>1</sup>, Veronika Öttl <sup>1</sup>, Hans-Frieder Schött <sup>1</sup>, Hongsup Yoon <sup>3,4</sup>, Dirk Haller <sup>3,4</sup>, Ernst Holler <sup>5</sup>, Ralph Burkhardt <sup>1</sup> and Silke Matysik <sup>1</sup>

<sup>1</sup> Institute for Clinical Chemistry and Laboratory Medicine, University Hospital Regensburg, Franz-Josef-Strauss-Allee 11, 93053 Regensburg, Germany; sebastian.roth@ukr.de (S.R.); Schweizer.sabine@gmx.net (S.S.); Veronika.Oettl@stud.uni-regensburg.de (V.O.); hans-frieder.schoett@isas.de (H.-F.S.); Ralph.Burkhardt@ukr.de (R.B.), silke.matysik@ukr.de (S.M.)

<sup>2</sup> Nutritional Physiology, Technical University of Munich, 85354 Freising, Germany; josef.ecker@tum.de

<sup>3</sup> ZIEL-Institute for Food & Health, Technical University of Munich, 85354 Freising, Germany; Hongsup.Yoon@tum.de (H.Y.); dirk.haller@tum.de (D.H.);

<sup>4</sup> Chair of Nutrition and Immunology, Technical University of Munich, 85354 Freising, Germany

<sup>5</sup> Department of Hematology and Oncology, Internal Medicine III, University Hospital Regensburg, 93053 Regensburg, Germany; Ernst.Holler@ukr.de

\* Correspondence: gerhard.liebisch@ukr.de; Tel.: +49-941-944-6240

## Suppl. Figure 1A-D: Product ion spectra of SCFA-3NPH derivatives

Product ion spectra were generated in the enhanced product ion mode at a collision energy of -20 V.

### FA 2:0

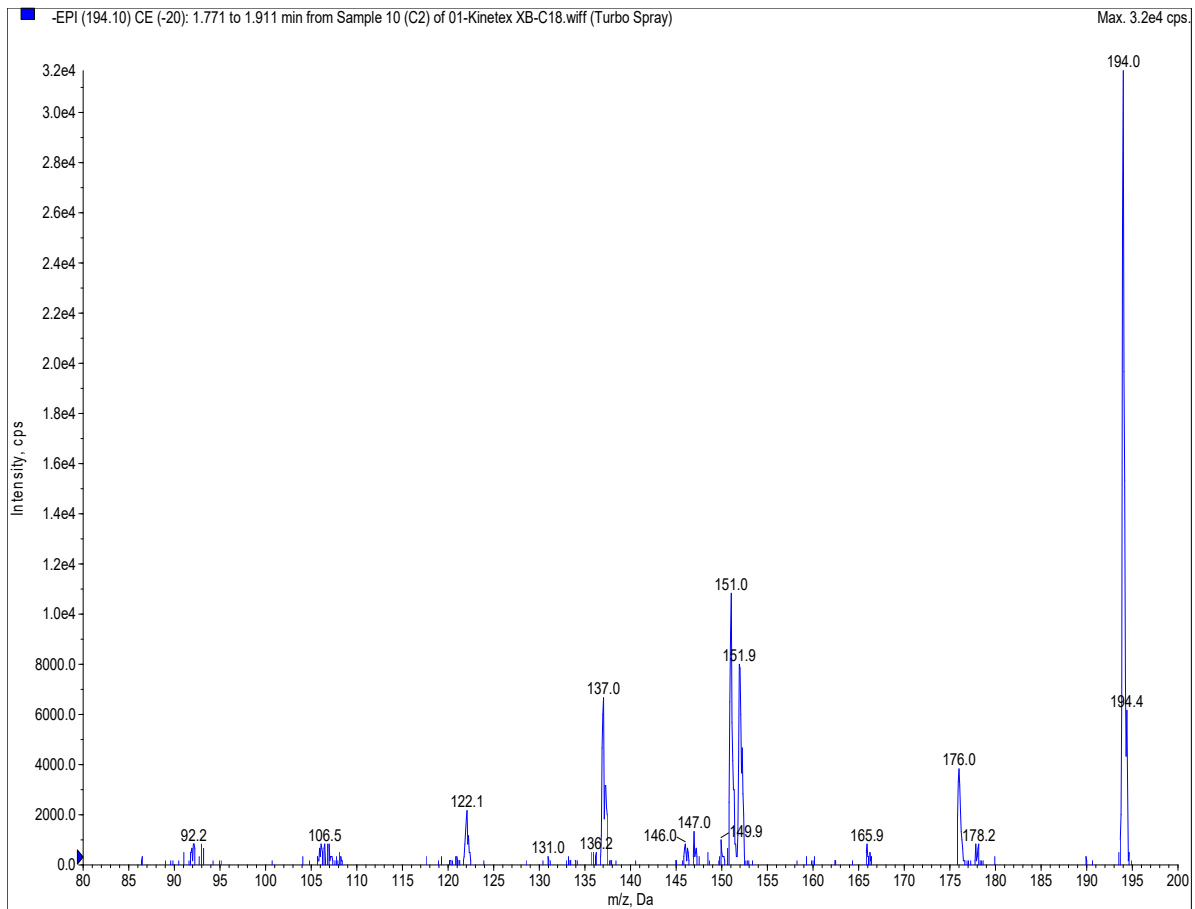

Figure S1A

**FA 3:0**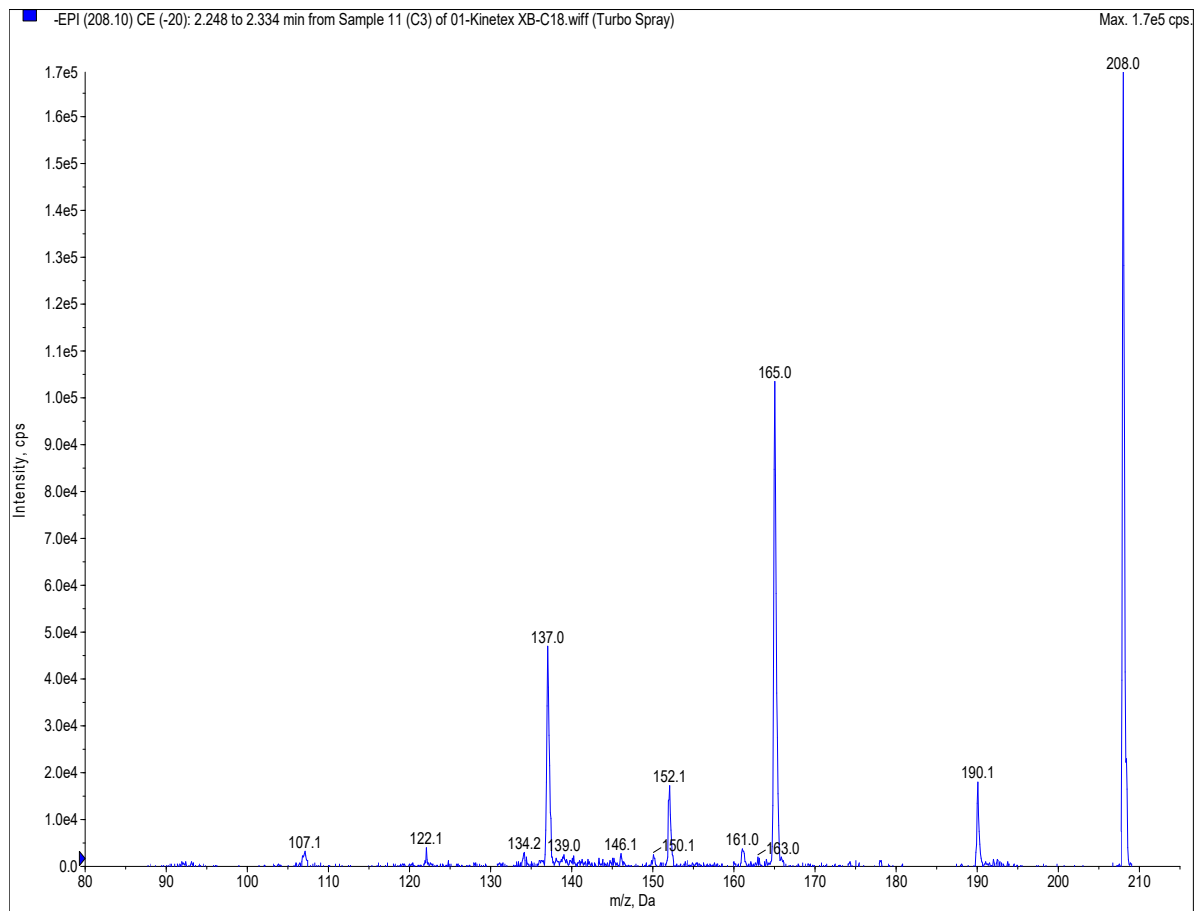**Figure S1B**

**FA 4:0**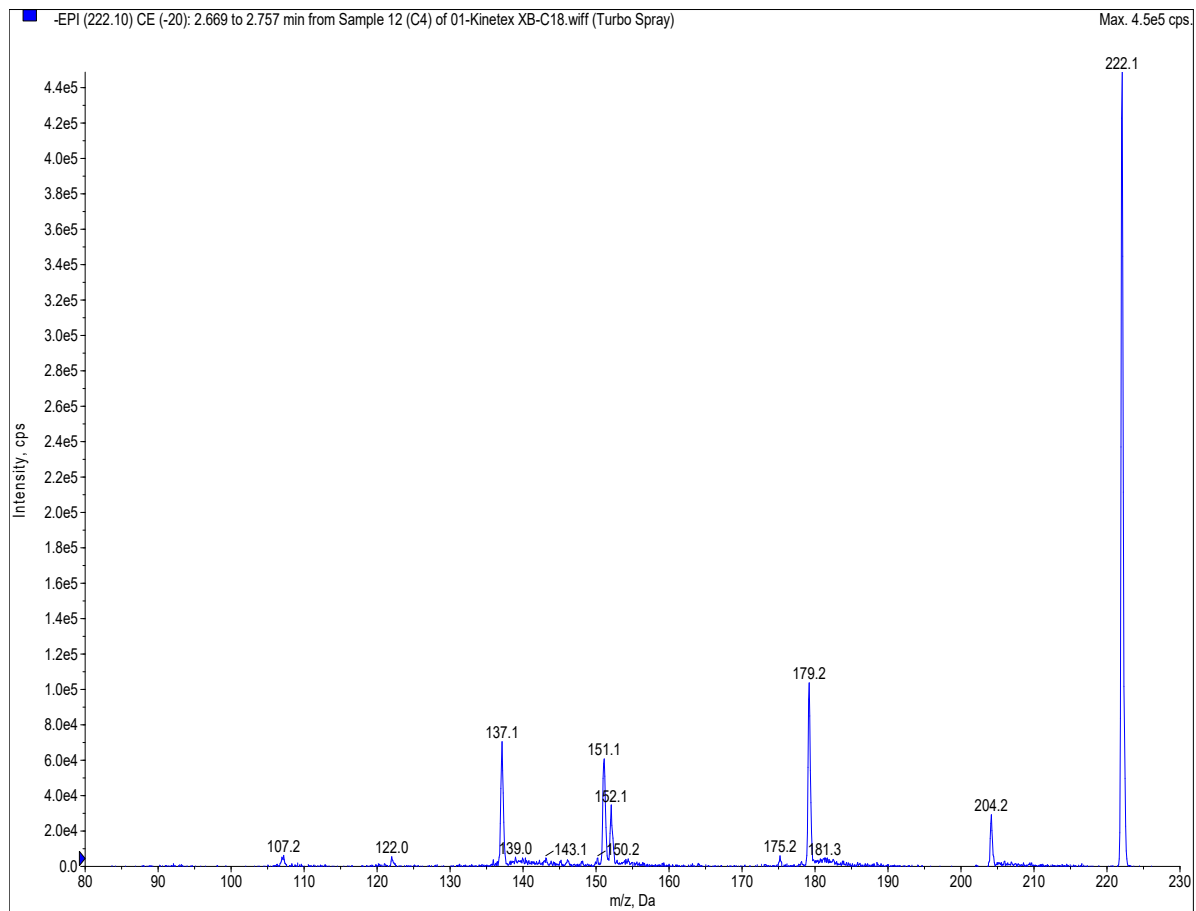**Figure S1C**

**FA 3:0(2Me)**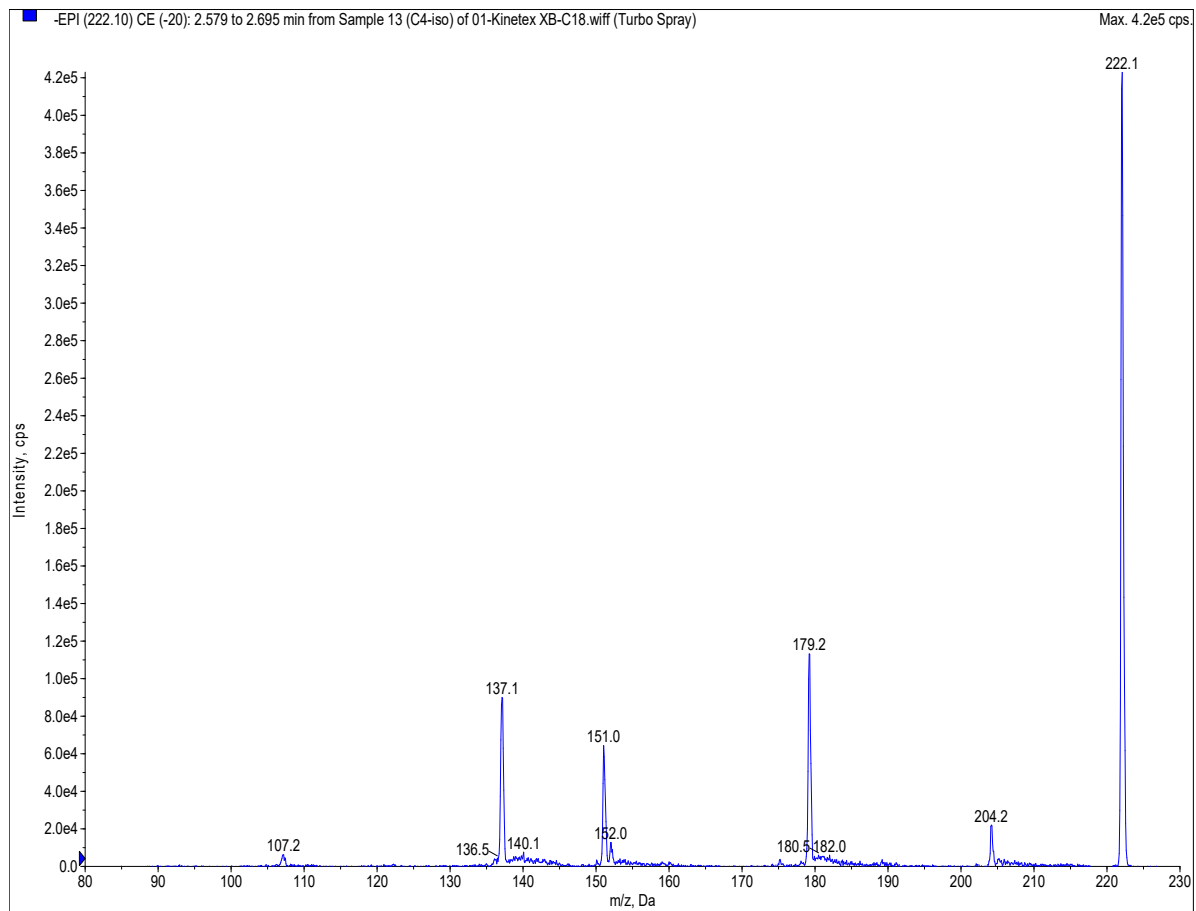**Figure S1D**

## Suppl. Figure 2A-D: Calibration lines:

Typical calibration line with 6 matrix based levels. Analyte concentrations are displayed in  $\mu\text{mol}/2\text{g DW}$ .

### FA 2:0

|   | Sample Name       | Sample Type | Analyte Peak Area (counts) | Analyte Concentration | IS Peak Area (counts) | Calculated Concentration | Accuracy (%) |
|---|-------------------|-------------|----------------------------|-----------------------|-----------------------|--------------------------|--------------|
| 1 | CAL 1_Eigen_07-18 | Standard    | 1.21e+004                  | 0.461                 | 1.32e+006             | 0.387                    | 84.0         |
| 2 | CAL 2_Eigen_07-18 | Standard    | 1.27e+005                  | 27.3                  | 1.31e+006             | 31.2                     | 114.         |
| 3 | CAL 3_Eigen_07-18 | Standard    | 2.51e+005                  | 60.1                  | 1.37e+006             | 61.4                     | 102.         |
| 4 | CAL 4_Eigen_07-18 | Standard    | 1.12e+006                  | 296.                  | 1.29e+006             | 301.                     | 102.         |
| 5 | CAL 5_Eigen_07-18 | Standard    | 3.48e+006                  | 1080.                 | 1.17e+006             | 1040.                    | 97.0         |
| 6 | CAL 6_Eigen_07-18 | Standard    | 6.00e+006                  | 2040.                 | 1.02e+006             | 2060.                    | 101.         |

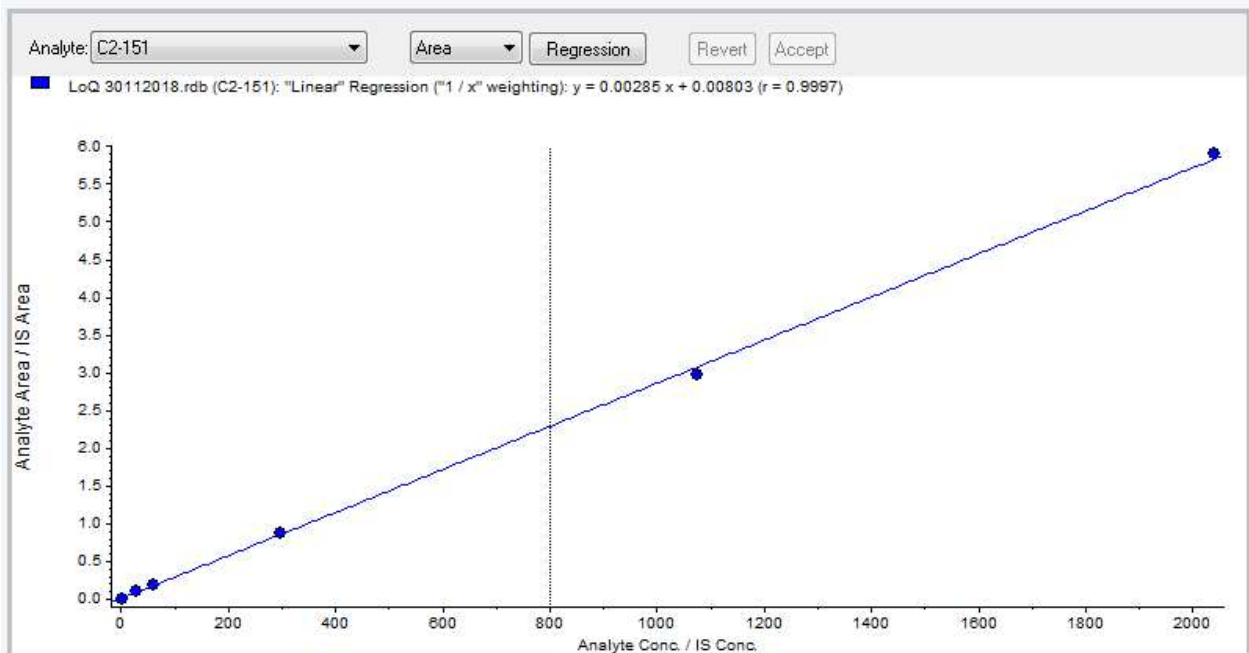

Figure S2A

## FA 3:0

|   | Sample Name       | Sample Type | Analyte Peak Area (counts) | Analyte Concentration | IS Peak Area (counts) | Calculated Concentration | Accuracy (%) |
|---|-------------------|-------------|----------------------------|-----------------------|-----------------------|--------------------------|--------------|
| 1 | CAL 1_Eigen_07-18 | Standard    | 4.96e+003                  | 0.430                 | 2.48e+006             | 0.412                    | 95.7         |
| 2 | CAL 2_Eigen_07-18 | Standard    | 1.69e+005                  | 9.43                  | 2.41e+006             | 10.2                     | 108.         |
| 3 | CAL 3_Eigen_07-18 | Standard    | 3.43e+005                  | 19.9                  | 2.61e+006             | 18.9                     | 95.1         |
| 4 | CAL 4_Eigen_07-18 | Standard    | 1.55e+006                  | 93.4                  | 2.32e+006             | 95.9                     | 103.         |
| 5 | CAL 5_Eigen_07-18 | Standard    | 6.66e+006                  | 466.                  | 2.08e+006             | 457.                     | 98.1         |
| 6 | CAL 6_Eigen_07-18 | Standard    | 1.10e+007                  | 893.                  | 1.75e+006             | 899.                     | 101.         |

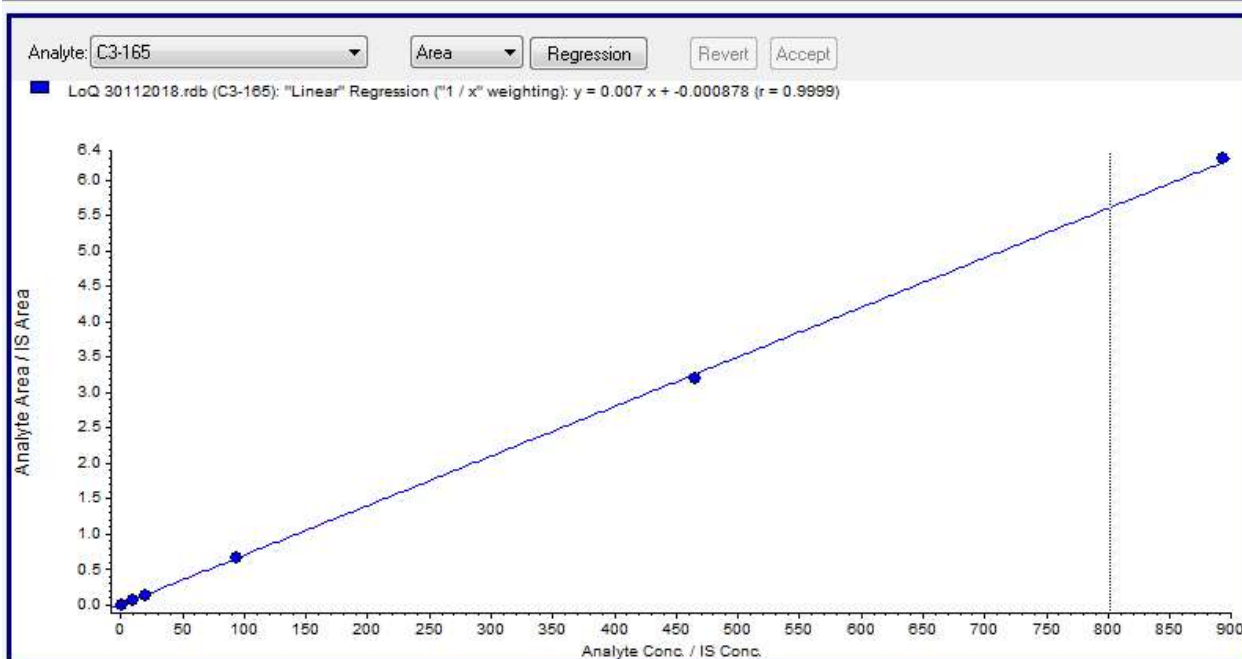

Figure S2B

## FA 4:0

|   | Sample Name       | Sample Type | Analyte Peak Area (counts) | Analyte Concentration | IS Peak Area (counts) | Calculated Concentration | Accuracy (%) |
|---|-------------------|-------------|----------------------------|-----------------------|-----------------------|--------------------------|--------------|
| 1 | CAL 1_Eigen_07-18 | Standard    | 0.00e+000                  | 0.0819                | 2.59e+006             | No Peak                  | 0.00         |
| 2 | CAL 2_Eigen_07-18 | Standard    | 9.25e+004                  | 8.53                  | 2.54e+006             | 8.56                     | 100.         |
| 3 | CAL 3_Eigen_07-18 | Standard    | 1.92e+005                  | 17.8                  | 2.63e+006             | 17.0                     | 95.6         |
| 4 | CAL 4_Eigen_07-18 | Standard    | 9.02e+005                  | 84.8                  | 2.53e+006             | 82.7                     | 97.5         |
| 5 | CAL 5_Eigen_07-18 | Standard    | 4.64e+006                  | 465.                  | 2.35e+006             | 459.                     | 98.8         |
| 6 | CAL 6_Eigen_07-18 | Standard    | 7.89e+006                  | 879.                  | 2.06e+006             | 887.                     | 101.         |

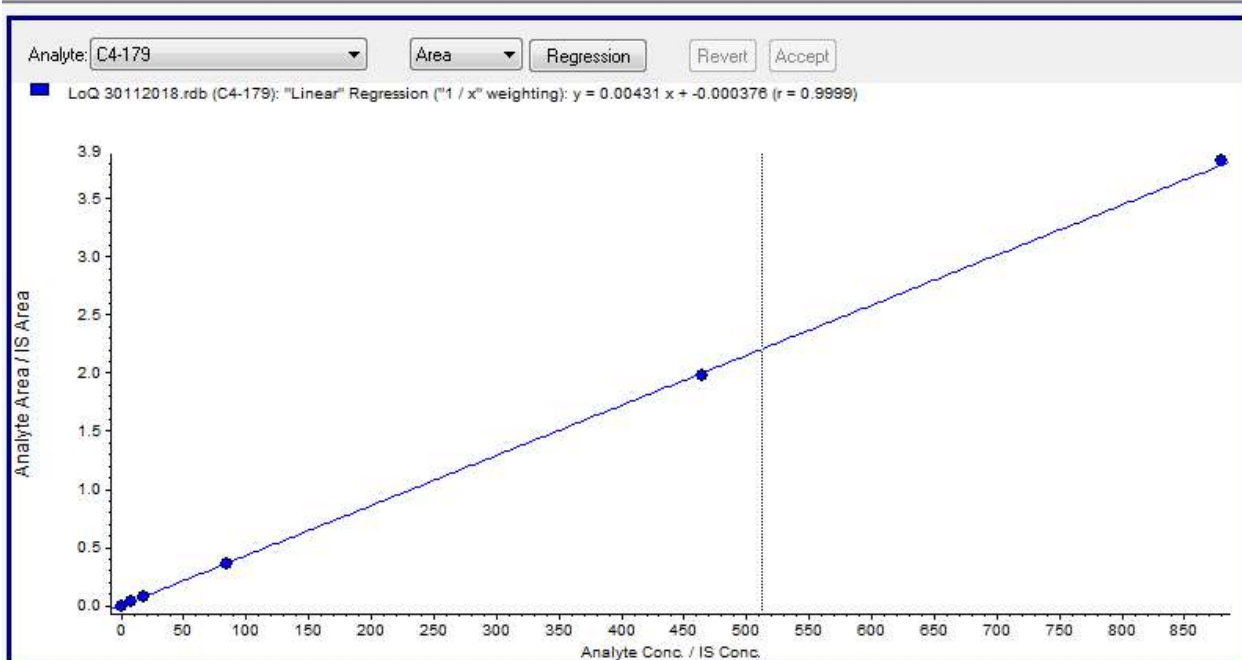

Figure S2C



**FA 3:0(2Me)**

|   | Sample Name       | Sample Type | Analyte Peak Area (counts) | Analyte Concentration | IS Peak Area (counts) | Calculated Concentration | Accuracy (%) |
|---|-------------------|-------------|----------------------------|-----------------------|-----------------------|--------------------------|--------------|
| 1 | CAL 1_Eigen_07-18 | Standard    | 0.00e+000                  | 0.0761                | 2.59e+006             | No Peak                  | 0.00         |
| 2 | CAL 2_Eigen_07-18 | Standard    | 7.89e+004                  | 5.99                  | 2.54e+006             | 6.04                     | 101.         |
| 3 | CAL 3_Eigen_07-18 | Standard    | 1.65e+005                  | 12.9                  | 2.63e+006             | 12.1                     | 93.5         |
| 4 | CAL 4_Eigen_07-18 | Standard    | 7.56e+005                  | 60.7                  | 2.53e+006             | 57.2                     | 94.2         |
| 5 | CAL 5_Eigen_07-18 | Standard    | 3.00e+006                  | 256.                  | 2.35e+006             | 245.                     | 95.7         |
| 6 | CAL 6_Eigen_07-18 | Standard    | 5.24e+006                  | 471.                  | 2.06e+006             | 486.                     | 103.         |

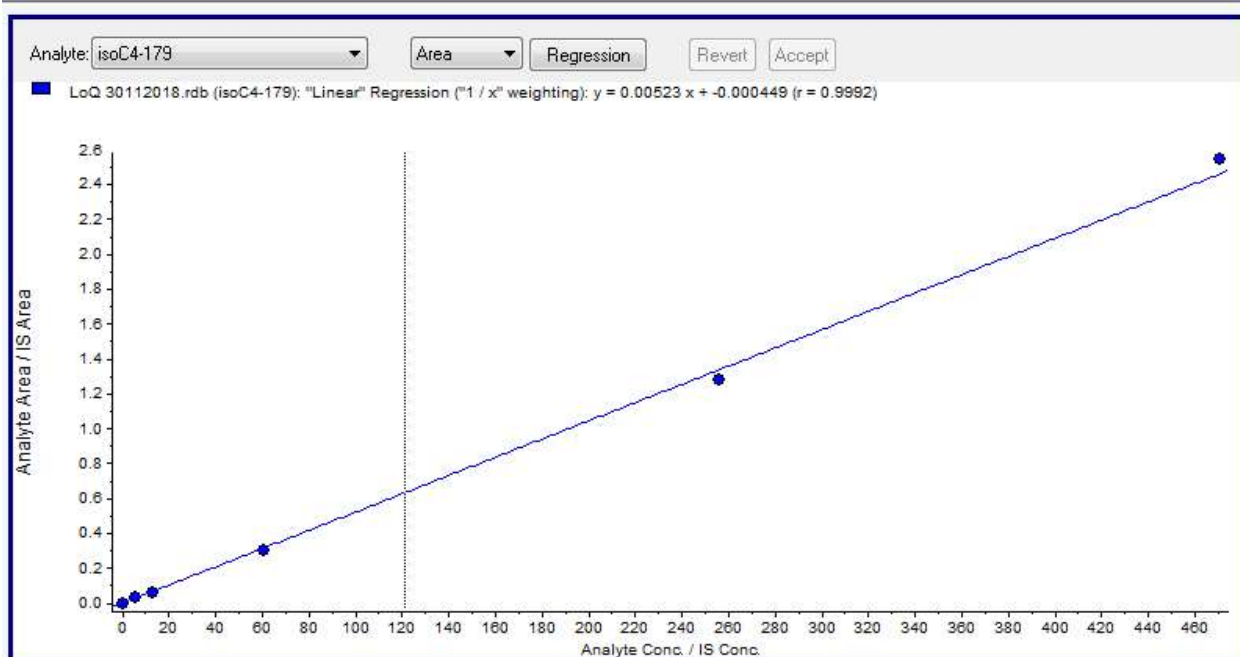**Figure S2D**

**Suppl. Table 1: LoD determination**

|                       | <b>FA 2:0</b> | <b>FA 3:0</b> |
|-----------------------|---------------|---------------|
| Mean (blank)          | 1.06          | 0.10          |
| SD (blank)            | 0.23          | 0.03          |
| <b>LoB</b>            | <b>1.44</b>   | <b>0.15</b>   |
| <b>SD (low conc.)</b> | <b>0.27</b>   | <b>0.028</b>  |
| <b>LoD</b>            | <b>1.88</b>   | <b>0.20</b>   |

$$\text{LoB} = \text{mean}(\text{blank}) + 1.645(\text{SD blank})$$

$$\text{LoD} = \text{LoB} + 1.645(\text{SD low concentration sample})$$

Displayed are mean and standard deviation calculated from internal standard blanks of nine different batches. Variations at low concentrations were calculated from the analysis of five sample aliquots of an 8-fold dilution of low QC (see Table 2). Limit of blank (LoB) and limit of detection (LoD) are calculated using the displayed equations. Values are [ $\mu\text{mol/g DW}$ ]
